# Supplementary material for: Violence Prevention Climate and Health-Oriented Leadership in German Emergency Departments
Source: MDPI journal article supplement (doi:10.3390/healthcare11162234), 2023-08-08
Supplement: s1 [file s1]

**Table S1.** *Stratified sampling technique*

| G-BA level | Number of EDs per G-BA level ( <i>a</i> ) | Proportion of each category in the total ( $b = a/1065*100$ ) | Number of EDs in each category to be included ( $c = b*200$ ) |
|------------|-------------------------------------------|---------------------------------------------------------------|---------------------------------------------------------------|
| 1          | 633                                       | 59%                                                           | 118                                                           |
| 2          | 265                                       | 25%                                                           | 50                                                            |
| 3          | 167                                       | 16%                                                           | 32                                                            |

**Table S2.** *Reliability analysis of Health-oriented Leadership instrument*

|                                              | Awareness | Value    | Personal lifestyle | Work behaviour | Complete scale |
|----------------------------------------------|-----------|----------|--------------------|----------------|----------------|
| Self-care                                    | .826 (6)  | .747 (3) | .866*(2)           | .719 (8)       | .853 (19)      |
| Supervisor staff-care                        | .797 (6)  | .829 (3) | .846 (3)           | .871 (10)      | .908 (22)      |
| Employee assessment of supervisor staff-care | .880 (6)  | .898 (3) | .869 (3)           | .914 (10)      | .949 (22)      |

Number of items in each subscale in parenthesis.

\*Spearman Brown coefficient value.

**Table S3.** *Assumption testing for multiple linear regression*

| Models  | Linearity | Independence of residuals | Homoscedasticity | Normally distributed errors | Multicollinearity | Outliers | Influential cases |
|---------|-----------|---------------------------|------------------|-----------------------------|-------------------|----------|-------------------|
| Model 1 | Yes       | 2.163                     | Yes              | Approximately normal        | 1.231             | 9        | .055              |
| Model 2 | Yes       | 1.795                     | Yes              | Approximately normal        | 1.231             | 8        | .047              |
| Model 3 | Yes       | 2.171                     | Yes              | Nearly approximately normal | 1.231             | 5        | .093              |
| Model 4 | Yes       | 1.878                     | Yes              | Approximately normal        | 1.016             | 5        | .082              |
| Model 5 | Yes       | 1.903                     | Yes              | Approximately normal        | 1.016             | 6        | .067              |
| Model 6 | Yes       | 1.655                     | Yes              | Approximately normal        | 1.016             | 12       | .101              |

**Table S4.** *Descriptive statistics per sub-scale of HoL*

|                              | M    | SD   | Reported minimum | Reported maximum |
|------------------------------|------|------|------------------|------------------|
| <b>Supervisor Self-care</b>  |      |      |                  |                  |
| Awareness                    | 3.40 | 0.84 | 1.50             | 5.00             |
| Value                        | 2.91 | 0.93 | 1.00             | 5.00             |
| Personal lifestyle           | 3.15 | 1.17 | 1.00             | 5.00             |
| Work Behaviour               | 1.85 | 0.66 | 1.38             | 4.75             |
| <b>Employee Self-care</b>    |      |      |                  |                  |
| Awareness                    | 3.45 | 0.94 | 1.17             | 5.00             |
| Value                        | 3.32 | 1.04 | 1.00             | 5.00             |
| Personal lifestyle           | 3.40 | 1.23 | 1.00             | 5.00             |
| Work Behaviour               | 2.87 | 0.70 | 1.00             | 4.63             |
| <b>Supervisor Staff-care</b> |      |      |                  |                  |
| Awareness                    | 3.82 | 0.63 | 1.00             | 5.00             |
| Value                        | 4.54 | 0.65 | 1.67             | 5.00             |
| Personal lifestyle           | 3.10 | 1.14 | 1.00             | 5.00             |
| Work Behaviour               | 3.54 | 0.73 | 1.00             | 5.00             |
| <b>Employee Staff-care</b>   |      |      |                  |                  |
| Awareness                    | 2.49 | 1.07 | 1.00             | 5.00             |
| Value                        | 2.87 | 1.28 | 1.00             | 5.00             |
| Personal lifestyle           | 1.72 | 0.99 | 1.00             | 5.00             |
| Work Behaviour               | 2.23 | 0.97 | 1.00             | 5.00             |

**Table S5.** *Descriptive statistics of main six variables*

|                |         | Self-care | Staff-care<br>by<br>supervisors | Employee<br>assessment<br>of supervisor<br>staff-care | Practices<br>and<br>responses | Policies<br>and<br>procedures | Pressure<br>for unsafe<br>practices |
|----------------|---------|-----------|---------------------------------|-------------------------------------------------------|-------------------------------|-------------------------------|-------------------------------------|
| <i>N</i>       | Valid   | 370       | 164                             | 204                                                   | 370                           | 370                           | 370                                 |
|                | Missing | 0         | 206                             | 166                                                   | 0                             | 0                             | 0                                   |
| Mean           |         | 3.13      | 3.72                            | 2.32                                                  | 18.60                         | 16.14                         | 18.49                               |
| Median         |         | 3.05      | 3.73                            | 2.23                                                  | 19.00                         | 16.00                         | 18.00                               |
| Std. Deviation |         | 0.64      | 0.54                            | 0.90                                                  | 5.76                          | 5.70                          | 5.25                                |
| Minimum        |         | 1.63      | 2.27                            | 1.00                                                  | 6                             | 6                             | 6                                   |
| Maximum        |         | 4.89      | 4.86                            | 4.82                                                  | 30                            | 30                            | 30                                  |

Missing values because of specificity of target population.

**Table S6.** Descriptive statistics for groups per position in ED for VPC variables

| Variables                                   |            | <i>M</i> | <i>Mdn</i> | <i>SD</i> | Skewness | Kurtosis |
|---------------------------------------------|------------|----------|------------|-----------|----------|----------|
| Violence prevention practices and responses | Supervisor | 20.80    | 21.00      | 5.19      | -0.316   | -0.239   |
|                                             | Employee   | 16.81    | 17.00      | 5.59      | -0.092   | -0.610   |
| Violence prevention policies and procedures | Supervisor | 17.83    | 18.00      | 5.47      | -0.109   | -0.369   |
|                                             | Employee   | 14.76    | 15.00      | 5.53      | 0.172    | -0.640   |
| Pressure for unsafe practices               | Supervisor | 20.30    | 19.00      | 5.19      | 0.163    | -0.621   |
|                                             | Employee   | 17.02    | 17.00      | 4.84      | 0.100    | -0.023   |

Supervisors, *n* = 166, Employees, *n* = 204.

**Table S7.** Descriptive statistics per professional group for VPC variables

| Variables                                   |        | <i>M</i> | <i>Mdn</i> | <i>SD</i> | Skewness | Kurtosis |
|---------------------------------------------|--------|----------|------------|-----------|----------|----------|
| Violence prevention practices and responses | Doctor | 20.44    | 21.00      | 5.61      | -0.591   | 0.065    |
|                                             | Nurse  | 17.81    | 18.00      | 5.65      | -0.074   | -0.491   |
| Violence prevention policies and procedures | Doctor | 16.31    | 16.00      | 5.74      | 0.037    | -0.510   |
|                                             | Nurse  | 16.07    | 16.00      | 5.70      | 0.038    | -0.631   |
| Pressure for unsafe practices               | Doctor | 20.14    | 19.00      | 4.90      | -0.099   | -0.047   |
|                                             | Nurse  | 17.78    | 17.00      | 5.251     | 0.334    | -0.065   |

Doctors, *n* = 112, Nurses, *n* = 258.

**Table S8.** Descriptive values per group for hypothesis testing for HoL variables

| Variables                 |            | <i>n</i> | <i>M</i> | <i>Mdn</i> | <i>SD</i> | Skewness | Kurtosis |
|---------------------------|------------|----------|----------|------------|-----------|----------|----------|
| Staff-care                | Supervisor | 164      | 3.72     | 3.73       | 0.54      | -0.383   | 0.030    |
|                           | Employee   | 204      | 2.32     | 2.23       | 0.90      | 0.626    | -0.203   |
| Self-care                 | Supervisor | 166      | 3.07     | 3.05       | 0.61      | 0.296    | -0.247   |
|                           | Employee   | 204      | 3.18     | 3.05       | 0.66      | 0.265    | -0.291   |
| Self-care                 | Doctor     | 122      | 3.02     | 3.00       | 0.54      | 0.250    | -0.138   |
|                           | Nurse      | 258      | 3.17     | 3.11       | 0.67      | 0.235    | -0.399   |
| Staff-care by supervisors | Doctor     | 75       | 3.64     | 3.68       | 0.55      | -0.571   | -0.002   |
|                           | Nurse      | 89       | 3.79     | 3.82       | 0.52      | -0.189   | -0.141   |
|                           | Doctor     | 37       | 2.53     | 2.59       | 0.77      | 0.397    | -0.272   |

|                                      |       |     |      |      |      |       |        |
|--------------------------------------|-------|-----|------|------|------|-------|--------|
| Employee on supervisor<br>staff-care | Nurse | 167 | 2.27 | 2.18 | 0.92 | 0.712 | -0.115 |
|--------------------------------------|-------|-----|------|------|------|-------|--------|

**Table S9.** *Holm-Bonferroni corrections for doctors and nurses*

| Population groups  | Hypothesis                                   | <i>p</i> -value | Rank | Holm-Bonferroni value |
|--------------------|----------------------------------------------|-----------------|------|-----------------------|
| Doctors and nurses | Practices                                    | 0.00001         | 1    | 0.008                 |
|                    | Policies                                     | 0.707           | 6    | 0.050                 |
|                    | Pressure                                     | 0.00001         | 1    | 0.008                 |
|                    | Self-care                                    | 0.052           | 4    | 0.017                 |
|                    | Supervisor staff-care                        | 0.078           | 5    | 0.025                 |
|                    | Employee assessment of supervisor staff-care | 0.049           | 3    | 0.013                 |

**Table S10.** *Holm-Bonferroni corrections for supervisors and employees*

| Population groups         | Hypothesis | <i>p</i> -value | Rank | Holm-Bonferroni value |
|---------------------------|------------|-----------------|------|-----------------------|
| Supervisors and employees | Practices  | 0.001           | 4    | 0.025                 |
|                           | Policies   | 0.00E+00        | 1    | 0.010                 |
|                           | Pressure   | 0.00E+00        | 1    | 0.010                 |
|                           | Staff-care | 0.00E+00        | 1    | 0.010                 |
|                           | Self-care  | 0.078           | 5    | 0.050                 |

**Table S11.** *Holm-Bonferroni corrections for supervisors (regression analysis)*

| Models  | <i>p</i> -value | Rank | Holm-Bonferroni value |
|---------|-----------------|------|-----------------------|
| Model 1 | 0.00008         | 2    | 0.025                 |
| Model 2 | 0.000019        | 1    | 0.017                 |
| Model 3 | 0.000744        | 3    | 0.050                 |

**Table S12.** *Holm-Bonferroni corrections for employees (regression analysis)*

| Models  | <i>p</i> -value | Rank | Holm-Bonferroni value |
|---------|-----------------|------|-----------------------|
| Model 4 | 0.000103        | 3    | 0.050                 |
| Model 5 | 0.000027        | 2    | 0.025                 |
| Model 6 | 8.95E-09        | 1    | 0.017                 |

**Table S13.** *Cross-validation of regression models*

| Models  | Difference between $R^2$ and adjusted $R^2$ from SPSS | New adjusted $R^2$ using Stein's formula | Difference between $R^2$ and new adjusted $R^2$ |
|---------|-------------------------------------------------------|------------------------------------------|-------------------------------------------------|
| Model 1 | 1.1%                                                  | .083                                     | 2.8%                                            |
| Model 2 | 1.0%                                                  | .099                                     | 2.7%                                            |
| Model 3 | 1.2%                                                  | .057                                     | 2.9%                                            |
| Model 4 | 0.9%                                                  | .064                                     | 2.3%                                            |
| Model 5 | 0.5%                                                  | .070                                     | 1.4%                                            |
| Model 6 | 0.8%                                                  | .147                                     | 2.1%                                            |
